# Supplementary material for: Integration of Genotoxic Biomarkers in Environmental Biomonitoring Analysis Using a Multi-Biomarker Approach in Three-Spined Stickleback (Gasterosteus aculeatus Linnaeus, 1758)
Source: MDPI journal article supplement (doi:10.3390/toxics10030101), 2022-02-22
Supplement: s1 [file s1]

# Supplementary Materials: Integration of Genotoxic Biomarkers in Environmental Biomonitoring Analysis Using a Multi-Biomarker Approach in Three-Spined Stickleback (*Gasterosteus aculeatus* Linnaeus, 1758)

Amélie Cant, Marc Bonnard, Jean-Marc Porcher, Jean Prygiel, Audrey Catteau, Laurence Delahaut, Olivier Palluel, Cyril Turiers, Alain Geffard and Anne Bado-Nilles

**Table S1.** Contribution (%) for each biomarker to the construction of the two main components of the PCA taking into account genotoxic and/or biometric, biochemical and innate immune biomarkers (Figures 2 and 3). Variables contributing more than 10% to the building of the axis are indicated in bold. HSI: hepatosomatic index; GSI: gonadosomatic index; Che: cholinesterase; EROD: 7-ethoxyresorufin-Odeethylase; GST: glutathione-S-transferase; GSH: total glutathione; GPx: glutathione peroxidase; SOD: superoxide dismutase; CAT: catalase; TBARS: lipid peroxidation; DNA: deoxyribonucleic acid.

|                          |                         | <b>Biometric, biochemical<br/>and immune biomarkers</b> |               | <b>Genotoxic, biometric, biochemical<br/>and immune biomarkers</b> |               |
|--------------------------|-------------------------|---------------------------------------------------------|---------------|--------------------------------------------------------------------|---------------|
|                          |                         | Dim.1 (18.2%)                                           | Dim.2 (15.0%) | Dim.1 (16.8%)                                                      | Dim.2 (14.0%) |
| Biometric index          | HSI                     | 10.54                                                   | 4.10          | 3.49                                                               | 12.72         |
| Reproductive system      | GSI                     | 0.89                                                    | 18.54         | 0.18                                                               | 16.47         |
| Innate immune responses  | Leucocyte mortality     | 10.29                                                   | 0.73          | 6.90                                                               | 1.36          |
|                          | Granulocyte-macrophage  | 9.79                                                    | 11.28         | 13.90                                                              | 1.48          |
|                          | Phagocytosis efficiency | 5.67                                                    | 6.20          | 7.80                                                               | 0.39          |
|                          | Lysosomal presence      | 7.35                                                    | 6.42          | 11.00                                                              | 1.22          |
|                          | Respiratory burst index | 14.80                                                   | 6.80          | 18.90                                                              | 0.32          |
| Neurotoxicity            | Che activity            | 6.37                                                    | 3.37          | 7.44                                                               | 0.03          |
| Metabolic detoxification | EROD activity           | 0.26                                                    | 3.33          | 0.18                                                               | 2.97          |
|                          | GST activity            | 6.54                                                    | 4.68          | 2.76                                                               | 4.50          |
| Antioxidant system       | GSH content             | 7.03                                                    | 0.02          | 5.67                                                               | 0.33          |
|                          | GPx activity            | 8.20                                                    | 20.51         | 0.78                                                               | 25.67         |
|                          | SOD activity            | 1.02                                                    | 0.46          | 0.54                                                               | 0.00          |
|                          | CAT activity            | 8.08                                                    | 12.72         | 2.24                                                               | 13.91         |
| Cell integrity           | TBARS content           | 3.17                                                    | 0.83          | 0.31                                                               | 5.99          |
| Erythrocyte mortality    | Erythrocyte necrosis    | /                                                       | /             | 1.01                                                               | 9.12          |
| Genotoxicity             | DNA strand-breaks       | /                                                       | /             | 3.82                                                               | 0.80          |
|                          | Chromosomal damage      | /                                                       | /             | 13.06                                                              | 2.70          |

**Table S2.** Results of statistical analysis carried out to assess the differences between stations in terms of sex. Each biomarker was analysed separately via a two-way ANOVA followed by a Tukey test for parametric data or two Kruskal–Wallis tests on site and sex factors separately, followed by a Nemenyi test for non-parametric data (\*\* =  $p < 0.001$ , \* =  $p < 0.01$ , \* =  $p < 0.05$ ).

| <i>p</i> .Value         | Site | Sex | Site*Sex | Used Data       | Test           |
|-------------------------|------|-----|----------|-----------------|----------------|
| Standard lenght         | ***  |     |          | Raw             | ANOVA          |
| Weight                  | ***  |     | /        | Raw             | Kruskal-Wallis |
| K                       | ***  | *** | /        | Raw             | Kruskal-Wallis |
| K - M                   | **   | /   | /        | Raw             | Kruskal-Wallis |
| K - F                   |      | /   | /        | Raw             | Kruskal-Wallis |
| HSI                     |      | *** | /        | Raw             | Kruskal-Wallis |
| HSI M                   |      | /   | /        | Log-transformed | ANOVA          |
| HSI F                   |      | /   | /        | Raw             | Kruskal-Wallis |
| GSI                     |      | *** | /        | Raw             | Kruskal-Wallis |
| GSI M                   |      | /   | /        | Log-transformed | ANOVA          |
| GSI F                   |      | /   | /        | Raw             | Kruskal-Wallis |
| SPG                     | ***  | *   | /        | Raw             | Kruskal-Wallis |
| SPG M                   |      |     |          |                 |                |
| SPG F                   |      |     |          |                 |                |
| L. Necrosis             | ***  |     | /        | Raw             | Kruskal-Wallis |
| L. Apoptosis            | ***  |     | /        | Raw             | Kruskal-Wallis |
| Granulocytes            | ***  |     |          | Raw             | ANOVA          |
| Phagocytosis capacity   | ***  | *   | /        | Raw             | Kruskal-Wallis |
| Phago Cap M             | ***  | /   | /        | Log-transformed | ANOVA          |
| Phago Cap F             | ***  | /   | /        | Raw             | Kruskal-Wallis |
| Phagocytosis efficiency | ***  |     | /        | Raw             | Kruskal-Wallis |
| Lysosomal presence      | ***  | **  |          | Log-transformed | ANOVA          |
| Lysosomal presence M    | ***  | /   |          | Raw             | ANOVA          |
| Lysosomal presence F    | ***  | /   | /        | Raw             | Kruskal-Wallis |
| Respiratory burst       | ***  |     | /        | Raw             | Kruskal-Wallis |
| Neurotoxicity           | ***  |     |          | Log-transformed | ANOVA          |
| EROD                    | ***  | *   |          | Log-transformed | ANOVA          |
| EROD M                  | ***  | /   | /        | Log-transformed | ANOVA          |
| EROD F                  | ***  | /   | /        | Log-transformed | ANOVA          |
| GST                     |      |     | /        | Raw             | Kruskal-Wallis |
| GPx                     |      | *** | /        | Raw             | Kruskal-Wallis |
| GPx M                   |      | /   | /        | Raw             | Kruskal-Wallis |
| GPx F                   | *    | /   | /        | Log-transformed | ANOVA          |
| GSH                     | ***  | *   | /        | Raw             | Kruskal-Wallis |
| GSH M                   | *    | /   | /        | Raw             | ANOVA          |
| GSH F                   | **   | /   | /        | Raw             | Kruskal-Wallis |
| SOD                     |      |     | /        | Raw             | Kruskal-Wallis |
| CAT                     | **   | *** | /        | Raw             | Kruskal-Wallis |
| CAT M                   | **   | /   | /        | Raw             | Kruskal-Wallis |
| CAT F                   | *    | /   | /        |                 |                |
| TBARS                   | ***  | *   |          | Raw             | ANOVA          |
| TBARS M                 |      | /   | /        | Raw             | ANOVA          |
| TBARS F                 | **   | /   | /        | Raw             | ANOVA          |
| Erythrocyte density     | ***  |     | /        | Raw             | Kruskal-Wallis |
| Erythrocytes necrosis   | ***  | **  | /        | Raw             | Kruskal-Wallis |
| Erythrocytes necrosis M | ***  | /   | /        | Raw             | Kruskal-Wallis |

|                         |     |   |   |                 |                |
|-------------------------|-----|---|---|-----------------|----------------|
| Erythrocytes necrosis F | *** | / | / | Log-transformed | ANOVA          |
| DNA strand breaks       | **  |   | / | Raw             | Kruskal-Wallis |
| Chromosomal damages     | *** |   | / | Raw             | Kruskal-Wallis |

**Table S3.** Biometric index (Fulton's condition, weight, standard condition) expressed as means  $\pm$  standard deviation for each station. Stars represent a significant difference obtained between the biometric index at T0 (the first day of the caging) and at T21 (after 21 days of caging in the field) according to a Student's *t*-test or a Wilcoxon–Mann–Whitney test (\* =  $p < 0.05$ ).

|                    | Standard length T0 (mm) |  | Standard length T21 (mm) |  | Weight T0 (g)   |  | Weight T21 (g)   |  | Fulton's condition index T0 |  | Fulton's condition index T21 |  |
|--------------------|-------------------------|--|--------------------------|--|-----------------|--|------------------|--|-----------------------------|--|------------------------------|--|
|                    | Mean $\pm$ SD           |  | Mean $\pm$ SD            |  | Mean $\pm$ SD   |  | Mean $\pm$ SD    |  | Mean $\pm$ SD               |  | Mean $\pm$ SD                |  |
| St Rémy du Nord    | 49.03 $\pm$ 4.13        |  | 49.68 $\pm$ 3.53         |  | 1.60 $\pm$ 0.41 |  | 1.87 $\pm$ 0.6 * |  | 1.35 $\pm$ 0.19             |  | 1.50 $\pm$ 0.24 *            |  |
| Artres             | 49.03 $\pm$ 3.59        |  | 49.43 $\pm$ 3.63         |  | 1.66 $\pm$ 0.37 |  | 1.61 $\pm$ 0.34  |  | 1.39 $\pm$ 0.09             |  | 1.32 $\pm$ 0.12 *            |  |
| Biache-Saint-Vaast | 46.80 $\pm$ 5.22        |  | 46.21 $\pm$ 4.60         |  | 1.43 $\pm$ 0.45 |  | 1.37 $\pm$ 0.42  |  | 1.37 $\pm$ 0.19             |  | 1.36 $\pm$ 0.14              |  |
| Courrières         | 45.67 $\pm$ 4.29        |  | 44.63 $\pm$ 3.32         |  | 1.30 $\pm$ 0.34 |  | 1.15 $\pm$ 0.22  |  | 1.35 $\pm$ 0.15             |  | 1.31 $\pm$ 0.13              |  |
| Bouchain           | 46.17 $\pm$ 3.86        |  | 46.38 $\pm$ 3.76         |  | 1.36 $\pm$ 0.36 |  | 1.41 $\pm$ 0.61  |  | 1.36 $\pm$ 0.12             |  | 1.29 $\pm$ 0.10 *            |  |
| Etaing             | 47.07 $\pm$ 3.94        |  | 46.21 $\pm$ 3.77         |  | 1.45 $\pm$ 0.36 |  | 1.4 $\pm$ 0.36   |  | 1.37 $\pm$ 0.14             |  | 1.40 $\pm$ 0.13              |  |

**Table S4.** Results of a statistical analysis carried out to assess the difference between each biometric index between T0 and T21 according to a Student's *t*-test or a Wilcoxon–Mann–Whitney test (\* =  $p < 0.05$ ).

| K                  | Sites | <i>p</i> .values ("two.sided") | <i>p</i> .values ("less or greater") | Difference   | Used data       | Test (Independent data) |
|--------------------|-------|--------------------------------|--------------------------------------|--------------|-----------------|-------------------------|
| St Rémy du Nord    |       | <i>p</i> .values = 0.02394     | <i>p</i> -value = 0.01197            | KT0 < KT21 * | Raw             | Wilcoxon                |
| Artres             |       | <i>p</i> -value = 0.01527      | <i>p</i> -value = 0.007634           | KT0 > KT21 * | Log-transformed | Student                 |
| Biache-Saint-Vaast |       | <i>p</i> .values = 0.9441      | /                                    |              | Raw             | Wilcoxon                |
| Courrières         |       | <i>p</i> .values = 0.6584      | /                                    |              | Raw             | Wilcoxon                |
| Bouchain           |       | <i>p</i> -value = 0.01289      | <i>p</i> -value = 0.006446           | KT0 > KT21 * | Raw             | Student                 |
| Etaing             |       | <i>p</i> -value = 0.4174       | /                                    |              | Raw             | Wilcoxon                |

| Weigh | Sites              | <i>p</i> .values ("two.sided") | <i>p</i> .values ("less or greater") | Difference     | Used data       | Test (Independent data) |
|-------|--------------------|--------------------------------|--------------------------------------|----------------|-----------------|-------------------------|
| ht    |                    |                                |                                      |                |                 |                         |
|       | St Rémy du Nord    | <i>p</i> -value = 0.02168      | <i>p</i> -value = 0.01084            | WeT0 < WET21 * | Raw             | Wilcoxon                |
|       | Artres             | <i>p</i> -value = 0.621        | /                                    |                | Raw             | Student                 |
|       | Biache-Saint-Vaast | <i>p</i> -value = 0.5853       | /                                    |                | Raw             | Student                 |
|       | Courrières         | <i>p</i> -value = 0.1853       | /                                    |                | Raw             | Student                 |
|       | Bouchain           | <i>p</i> -value = 0.5291       | /                                    |                | Log-transformed | Student                 |
|       | Etaing             | <i>p</i> -value = 0.1871       | /                                    |                | Raw             | Wilcoxon                |

| Standard lenght | Sites              | <i>p</i> .values ("two.sided") | <i>p</i> .values ("less or greater") | Difference | Used data       | Test (Independent data) |
|-----------------|--------------------|--------------------------------|--------------------------------------|------------|-----------------|-------------------------|
|                 | St Rémy du Nord    | <i>p</i> -value = 0.5265       | /                                    |            | Raw             | Student                 |
|                 | Artres             | <i>p</i> -value = 0.6781       | /                                    |            | Raw             | Student                 |
|                 | Biache-Saint-Vaast | <i>p</i> -value = 0.653        | /                                    |            | Raw             | Student                 |
|                 | Courrières         | <i>p</i> -value = 0.3683       | /                                    |            | Raw             | Student                 |
|                 | Bouchain           | <i>p</i> -value = 0.8268       | /                                    |            | Log-transformed | Student                 |
|                 | Etaing             | <i>p</i> -value = 0.6781       | /                                    |            | Raw             | Student                 |

**Table S5.** Distribution of land use around each river studied along the Artois-Picardie Watershed in 2018. Downgraded substances were defined according to the criteria of the Water Framework Directive (WFD, 2000/60/EC). Wastewater treatment plants and industries presented correspond to those impacting the water body. (Data of the Artois-Picardie Water Agency (Consulter les données de qualité des rivières | Agence de l'Eau Artois-Picardie (eau-artois-picardie.fr)).

|                             | Cligneux       | Rhonelle        | Scarpe            | Deule           | Sensée          |
|-----------------------------|----------------|-----------------|-------------------|-----------------|-----------------|
| Body of surface water       | Natural        | Natural         | Strongly modified | Artificial      | Natural         |
| Artificial territory        | 240<br>(7.1)   | 4 483<br>(30.4) | 3802<br>(25.9)    | 13003<br>(45.2) | 2795<br>(16.0)  |
| Forest and natural area     | 183<br>(5.4)   | 272<br>(1.9)    | 342<br>(2.3)      | 1161<br>(4.0)   | 445<br>(2.5)    |
| Wetland                     | 0<br>(0.0)     | 31<br>(0.2)     | 201<br>(1.4)      | 0<br>(0.0)      | 553<br>(3.2)    |
| Agricultural territory      | 2970<br>(87.5) | 9885<br>(67.0)  | 10243<br>(69.8)   | 14589<br>(50.7) | 13487<br>(77.1) |
| Wastewater treatment plants | 2              | 5               | 8                 | 8               | 5               |
| Industries                  | 5              | 56              | 78                | 143             | 14              |
| Downgrading substance       | PAH            | PAH             | PAH               | PAH and Pb      | PAH             |

Data are expressed in hectare (% of land use distribution). PAH: polycyclic aromatic hydrocarbon. PB: lead.
